# Supplementary material for: Fibrosis in Human Adipose Tissue: Composition, Distribution, and Link With Lipid Metabolism and Fat Mass Loss
Source: PubMed Central journal article supplement — Diabetes. 2010 Aug 16;59(11):2817–25. doi: 10.2337/db10-0585 (PMC2963540; doi:10.2337/db10-0585), 2010-08-16
Supplement: supp_db10-0585_db100585onlineappendix.pdf [file supp_db10-0585_db100585onlineappendix.pdf]

## ONLINE APPENDIX

### EXPERIMENTAL PROCEDURES

#### Figure 1: Electron microscopic observation of WAT fibrosis.

Small fragments of tissue were fixed in 4% glutaraldehyde in 0.1M phosphate buffer, pH 7.4, for 4 h, post-fixed in 1% osmium tetroxide, and embedded in an Epon-Araldite mixture. Semithin sections (2 $\mu$ m) were stained with toluidine blue, and thin sections were obtained on an ultratome, stained with lead citrate, and examined with transmission electron microscope.

We observed deposit of fibrin (F) (a) and well organized collagen I (Col) (b) between adipocyte. The panel (c) shows the presence of less organized fibers, those evocate collagen VI fibers (Col).

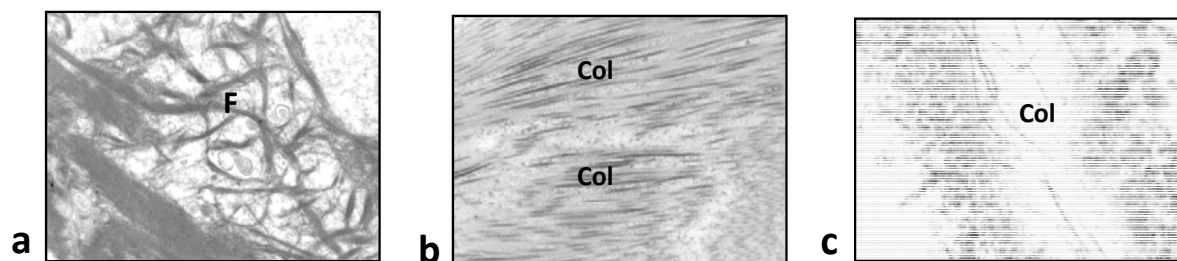

#### Figure 2: Immunohistochemistry of obese scWAT with a perilipin antibody.

scWAT biopsies were obtained during gastric in obese subject. Biopsies were fixed overnight at 4°C in 4 % paraformaldehyde and processed for standard paraffin embedding. Sections of 5  $\mu$ m were stained as described below and observed under a Zeiss 20 Axiostar Plus microscope (Zeiss, Germany). We used a perilipin antibody (Lifespan Biosciences, Seattle, USA). Method specificity tests were performed by omission of primary antibodies.

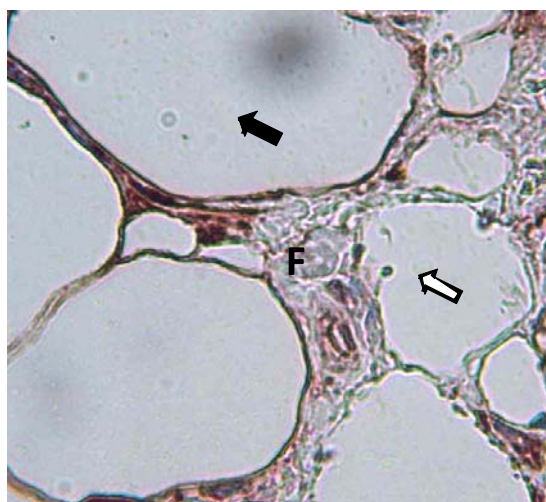

Obese adipose tissue section was stained with a perilipin antibody. Positive staining appeared in brown. Black arrow indicates adipocyte perilipin positive and open arrow indicates adipocyte perilipin negative. This slide is representative of 5 independent experiments.

F: Fibrosis.

### Adipocyte diameters measure in parenchyma and in fibrotic areas.

Digital photomicrographs of H&E slides were analyzed using PerfectImage Software (ClaraVision, France). We measured the diameter of all adjacent adipocytes from each of 4 separate photographs of the same slide in parenchyma, at distance from fibrosis area. The diameter of adipocytes close or within fibrosis was measured on some slides. These measures were performed at x 10 magnification, with 200-300 adipocyte diameters measured for each biopsy. The data were transferred to an Excel program to calculate the mean adipocyte diameter and standard deviation for each sample.

## RESULTS

**Table 1: Clinical parameters of lean and obese subjects**

| Clinical parameters               | Obese subjects<br>(n=65) | Lean subjects<br>(n=9) | p value |
|-----------------------------------|--------------------------|------------------------|---------|
| Age (years)                       | 39.9 ± 1.4               | 46.0 ± 4.2             | NS      |
| Gender (M/F)                      | 15/50                    | 2/7                    | NS      |
| <b>Adiposity markers</b>          |                          |                        |         |
| BMI (kg/m <sup>2</sup> )          | 48.2 ± 0.8               | 22.8 ± 0.6             | <0.0001 |
| Body weight (kg)                  | 135.0 ± 3.0              | 59.4 ± 1.6             | <0.0001 |
| Fat mass %                        | 46.2 ± 0.69              | ND                     |         |
| Leptin (ng/ml)                    | 63.0 ± 3.1               |                        |         |
| <b>Plasma Glucose homeostasis</b> |                          |                        |         |
| Glycaemia (mmol/l)                | 6.55 ± 0.37              | 5.10 ± 0.21            |         |
| Insulinemia (μU/mL)               | 19.02 ± 1.81             |                        |         |
| QUICKI                            | 0.31 ± 0.003             |                        |         |
| Diabetic                          | 32.3 %                   | 0%                     |         |
| Adiponectin (μg/ml)               | 6.08 ± 0.36              |                        |         |
| <b>Plasma lipid homeostasis</b>   |                          |                        |         |
| Total cholesterol (mmol/l)        | 5.00 ± 0.12              | 4.80 ± 0.55            | NS      |
| Total triglycerides (mmol/l)      | 1.53 ± 0.1               | 1.10 ± 0.27            | <0.0001 |
| HDL cholesterol (mmol/l)          | 1.28 ± 0.05              | 1.3 ± 0.22             | NS      |
| <b>Liver test</b>                 |                          |                        |         |
| AST (IU/L)                        | 24.5 ± 1.4               | 24.2 ± 6.4             | NS      |
| ALT (IU/L)                        | 35.4 ± 3.4               | 24.5 ± 6.8             | NS      |
| γGT (IU/L)                        | 48.9 ± 5.2               | 16.7 ± 3.31            | <0.0001 |
| <b>Inflammatory markers</b>       |                          |                        |         |
| Plasma hsCRP (mg/dl)              | 0.91 ± 0.08              |                        |         |
| Plasma IL-6 (pg/ml)               | 3.94 ± 0.32              |                        |         |
| <b>Adipose tissue phenotype</b>   |                          |                        |         |
| Sc adipocyte diameters (μm)       | 75.14 ± 1.16             |                        |         |
| ATM scWAT (%)                     | 14.70 ± 0.99             |                        |         |
| Om adipocyte diameters (μm)       | 66.83 ± 1.25             |                        |         |
| ATM oWAT (%)                      | 28.78 ± 1.82             |                        |         |

NS: not significant; ND: not determined

**Table 2: Multiple linear regression modeling**

| Triglycerides           | F ratio     | p value      |
|-------------------------|-------------|--------------|
| Log total oWAT fibrosis | <b>7.51</b> | <b>0.008</b> |
| oWAT adipocyte size     | <b>6.79</b> | <b>0.012</b> |
| Diabetic status         | 3.00        | 0.089        |
| Log age                 | 0.22        | 0.640        |
| Log BMI                 | 0.02        | 0.892        |
| Gender                  | <0.01       | 0.981        |

Association between triglyceride level and total oWAT fibrosis remains significant after adjustment with gender, diabetic status, age, BMI and omental adipocyte size (least squares means analysis).

**Table 3: Clinical parameters in cluster of fat mass loss**

|                             | Group B     | Group A     | Group C                   | Anova |
|-----------------------------|-------------|-------------|---------------------------|-------|
| <b>Age (year)</b>           | 37.6 ± 2.91 | 39.6 ± 2.43 | 45.2 ± 3.79               | NS    |
| <b>Gender (F/M)</b>         | 11/4        | 20/1        | 8/1                       | NS    |
| <b>Adiposity markers</b>    |             |             |                           |       |
| Body Weight(kg)             | 130 ± 4.17  | 121 ± 3.50  | 133 ± 5.30                | NS    |
| BMI (kg/m <sup>2</sup> )    | 44.5 ± 1.33 | 45.6 ± 1.13 | 50.0 ± 1.72 <sup>*†</sup> | 0.044 |
| Fat mass (%weight)          | 43.8 ± 1.12 | 46.5 ± 0.95 | 48.5 ± 1.44 <sup>*</sup>  | 0.040 |
| Leptin (ng/ml)              | 53.2 ± 5.95 | 65.8 ± 5.03 | 71.2 ± 7.68               | NS    |
| <b>Glucose homeostasis</b>  |             |             |                           |       |
| Glycaemia (mmol/l)          | 5.19 ± 0.39 | 5.90 ± 0.33 | 6.41 ± 0.50               | NS    |
| Insulinemia (μU/mL)         | 16.5 ± 4.19 | 24.1 ± 3.54 | 16.6 ± 5.41               | NS    |
| Adiponectin (μg/ml)         | 6.20 ± 0.56 | 5.07 ± 0.49 | 7.10 ± 0.73               | NS    |
| Diabetic (%)                | 27          | 33          | 44                        | NS    |
| <b>Lipids</b>               |             |             |                           |       |
| Cholesterol (mmol/l)        | 4.86 ± 0.25 | 5.17 ± 0.22 | 4.65 ± 0.33               | NS    |
| Triglycerides (mmol/l)      | 1.26 ± 0.10 | 1.35 ± 0.09 | 1.29 ± 0.13               | NS    |
| HDL cholesterol (mmol/l)    | 1.36 ± 0.19 | 1.56 ± 0.16 | 1.45 ± 0.24               | NS    |
| <b>Liver test</b>           |             |             |                           |       |
| AST                         | 22.0 ± 2.48 | 24.6 ± 2.13 | 22.7 ± 3.09               | NS    |
| ALT                         | 31.6 ± 6.09 | 37.0 ± 5.23 | 27.2 ± 7.60               | NS    |
| GGT                         | 51.6 ± 11.7 | 49.6 ± 10.3 | 41.3 ± 14.6               | NS    |
| <b>Inflammatory markers</b> |             |             |                           |       |
| Plasma hsCRP (mg/l)         | 0.79 ± 0.17 | 0.89 ± 0.13 | 0.72 ± 0.22               | NS    |
| Plasma IL-6 (pg/ml)         | 2.68 ± 0.66 | 3.81 ± 0.55 | 6.04 ± 0.84 <sup>*†</sup> | 0.013 |

\* Significant difference between C and B;

† Significant difference between C and A.

NS: not significant

Group C corresponds to the group of subjects experiencing the lowest loss of fat mass.

Group B corresponds to the group of subjects experiencing the highest loss of fat mass.

**Table 4: Multiple linear regression modeling.**

|                                  |          | <b>total fibrosis</b> |                | <b>pericellular fibrosis</b> |                |
|----------------------------------|----------|-----------------------|----------------|------------------------------|----------------|
|                                  |          | <i>t-value</i>        | <i>p-value</i> | <i>t-value</i>               | <i>p-value</i> |
| <b>% of fat mass loss at 3M</b>  | fibrosis | - 2.62                | 0.012          | - 1.69                       | 0.098          |
|                                  | IL-6     | - 2.13                | 0.039          | - 2.32                       | 0.024          |
| <b>% of fat mass loss at 6M</b>  | fibrosis | - 2.10                | 0.041          | - 1.97                       | 0.055          |
|                                  | IL-6     | - 2.88                | 0.006          | - 3.12                       | 0.003          |
| <b>% of fat mass loss at 12M</b> | fibrosis | - 1.80                | 0.078          | - 1.92                       | 0.062          |
|                                  | IL-6     | - 1.95                | 0.057          | - 2.12                       | 0.039          |

Association between the percentage of fat mass loss at 3M, 6M and 12M post-surgery and total scWAT fibrosis remains significant after adjustment with circulating IL-6 level. The same association appears weaker with pericellular scWAT fibrosis.  
t-value: ratio of the parameter estimate to its standard error.
